# Supplementary figures and images for: Low-temperature synthesis of LiFePO4 nanocrystals by solvothermal route
Source: Springer Nature journal article supplement (doi:10.1186/1556-276x-7-3), 2012-01-05

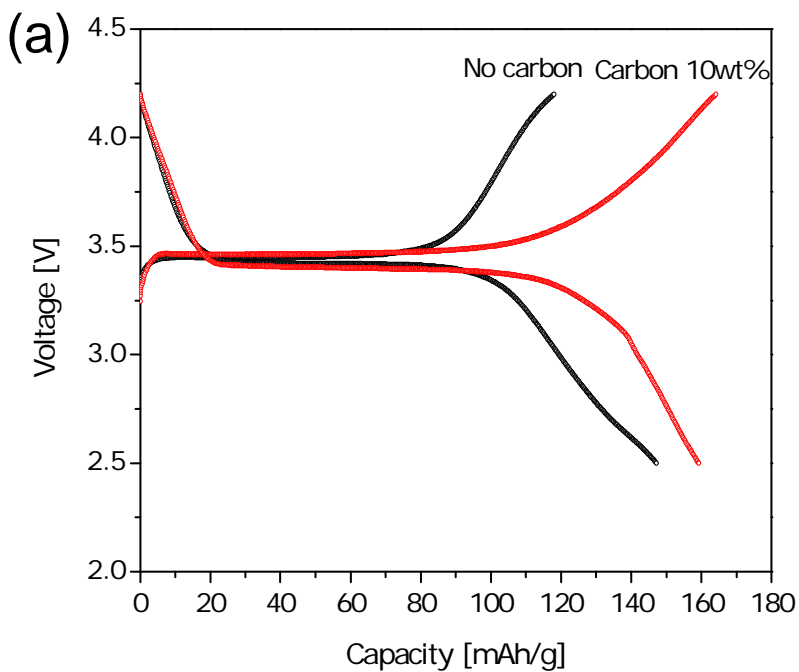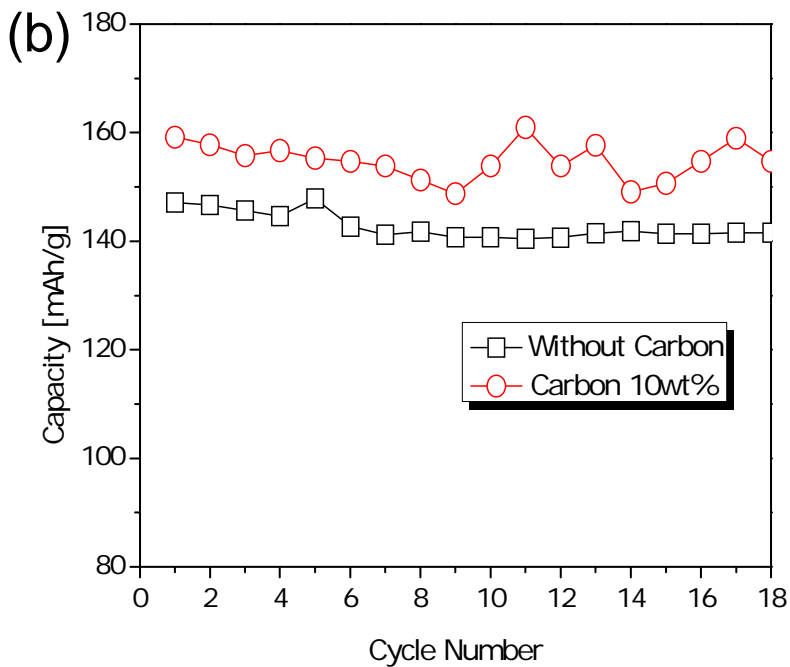

Supplement: 11671_2011_652_MOESM5_ESM.pdf [file 11671_2011_652_MOESM5_ESM.pdf]
